# Supplementary material
Source: Springer Nature journal article supplement (https://www.springermedizin.de/resource/supplementary/12969_2012_971_MOESM1_ESM.pdf/9589138)
Supplement: MOESM1 [file 9589138]

## Supplementary Results

Five SNPs failing QC were excluded from analysis.

The following SNPs were excluded due to poor raw data clustering and resultant low genotype call rate:

rs333 (CCR5)

rs5030737 (MBL2)

rs1800629 (TNFA)

The following SNPs were excluded because Hardy Weinberg Equilibrium  $p < 0.01$  in controls:

rs1773560 (CD247)

rs17810546 (IL12A)

**Supplementary Table 1: CLARITY SNP association results, restricted to those of European ancestry, as defined by ethnicity data obtained for all four of the child's grandparents. Case n = 200, control n = 341.**

| Gene           | SNP        | Minor allele | Case MAF | Control MAF | Best Test      | Allelic |                   |
|----------------|------------|--------------|----------|-------------|----------------|---------|-------------------|
|                |            |              |          |             | P <sup>s</sup> | P       | OR (95% CI)       |
| ADAD1-IL2-IL21 | rs17388568 | A            | 0.30     | 0.28        | 0.44 T         | 0.44    | 1.11 (0.85, 1.46) |
|                | rs13143866 | A            | 0.27     | 0.26        | 0.23 R         | 0.78    | 1.04 (0.79, 1.38) |
|                | rs6822844  | T            | 0.15     | 0.13        | 0.31 R         | 0.43    | 1.16 (0.81, 1.65) |
| AFF3           | rs1160542  | G            | 0.49     | 0.45        | 0.20 R         | 0.23    | 1.16 (0.91, 1.49) |
| ANGPT1         | rs1010824  | T            |          |             | FAILED QC      |         |                   |
| ATXN2          | rs653178   | G            | 0.41     | 0.47        | 0.022 R        | 0.054   | 0.78 (0.61, 1.01) |
| BACH2          | rs11755527 | G            | 0.44     | 0.47        | 0.23 D         | 0.27    | 0.87 (0.68, 1.12) |
| C12orf30       | rs17696736 | G            | 0.53     | 0.48        | 0.031 D        | 0.099   | 1.23 (0.96, 1.58) |
| C3orf1         | rs4688011  | A            | 0.23     | 0.18        | 0.041 D        | 0.051   | 1.35 (1.00, 1.83) |
| CD14           | rs2569190  | A            | 0.49     | 0.50        | 0.57 R         | 0.74    | 0.96 (0.75, 1.23) |
| CD226          | rs763361   | T            | 0.54     | 0.47        | 0.051 T        | 0.051   | 1.28 (1.00, 1.64) |
| CLEC16A        | rs6498169  | G            | 0.36     | 0.35        | 0.62 R         | 0.85    | 1.03 (0.79, 1.33) |
| COG6           | rs7993214  | T            | 0.30     | 0.29        | 0.46 D         | 0.54    | 1.09 (0.83, 1.43) |
| CTLA4          | rs3087243  | A            | 0.46     | 0.48        | 0.34 R         | 0.60    | 0.94 (0.73, 1.20) |
| DCN1*          | rs939898   | G            | 0.24     | 0.19        | 0.044 D        | 0.055   | 1.34 (0.99, 1.81) |
| ERAP1          | rs30187    | T            | 0.38     | 0.36        | 0.44 D         | 0.67    | 1.06 (0.82, 1.37) |
| FHIT*          | rs9311745  | C            | 0.05     | 0.07        | 0.25 T         | 0.25    | 0.73 (0.42, 1.25) |
| HUNK*          | rs2833547  | T            | 0.29     | 0.28        | 0.88 D         | 0.90    | 1.02 (0.77, 1.34) |
| IL15           | rs13139573 | T            | 0.47     | 0.45        | 0.027 D        | 0.48    | 1.09 (0.85, 1.40) |
| IL23R          | rs11209026 | A            | 0.07     | 0.06        | 0.51 T         | 0.52    | 1.18 (0.72, 1.94) |
|                | rs11465804 | G            | 0.06     | 0.06        | 0.71 T         | 0.72    | 1.10 (0.65, 1.85) |
| IL2RA          | rs12251307 | T            | 0.10     | 0.12        | 0.25 A         | 0.25    | 0.79 (0.53, 1.18) |
|                | rs706778   | A            | 0.45     | 0.44        | 0.28 R         | 0.63    | 1.06 (0.83, 1.36) |
|                | rs2104286  | G            | 0.21     | 0.24        | 0.15 R         | 0.37    | 0.87 (0.64, 1.18) |
| IL7R           | rs6897932  | T            | 0.25     | 0.24        | 0.58 D         | 0.77    | 1.04 (0.78, 1.39) |
| JMJD1C-REEP3   | rs6479891  | T            | 0.17     | 0.17        | 0.35 R         | 0.80    | 0.96 (0.69, 1.33) |
|                | rs12411988 | C            | 0.16     | 0.17        | 0.47 D         | 0.63    | 0.92 (0.66, 1.29) |
| KIF5A          | rs1678542  | C            | 0.34     | 0.35        | 0.55 D         | 0.75    | 0.96 (0.74, 1.24) |
| LPP            | rs1464510  | T            | 0.44     | 0.48        | 0.026 D        | 0.19    | 0.85 (0.66, 1.08) |
| MBL2           | rs1800451  | A            | 0.03     | 0.01        | 0.051 T        | 0.053   | 2.31 (0.97, 5.54) |

|               |            |   |      |      |         |       |                   |
|---------------|------------|---|------|------|---------|-------|-------------------|
| MEFV          | rs224204   | T | 0.48 | 0.48 | 0.55 D  | 0.81  | 1.03 (0.80, 1.32) |
| NLRP3         | rs3806265  | C | 0.31 | 0.36 | 0.048 D | 0.12  | 0.81 (0.62, 1.06) |
| NOD2          | rs1861759  | C | 0.39 | 0.38 | 0.51 D  | 0.84  | 1.03 (0.80, 1.32) |
| NRBF2-EGR2    | rs10995450 | T | 0.20 | 0.21 | 0.54 T  | 0.55  | 0.91 (0.67, 1.24) |
| PRKCQ         | rs4750316  | C | 0.16 | 0.18 | 0.33 R  | 0.45  | 0.88 (0.63, 1.23) |
| PSTPIP1       | rs4078354  | T | 0.33 | 0.37 | 0.096 R | 0.17  | 0.83 (0.64, 1.08) |
| PTPN2         | rs1893217  | C | 0.21 | 0.20 | 0.51 R  | 0.53  | 1.10 (0.81, 1.50) |
|               | rs7234029  | G | 0.21 | 0.18 | 0.14 A  | 0.14  | 1.26 (0.93, 1.72) |
|               | rs2542151  | G | 0.22 | 0.20 | 0.45 D  | 0.47  | 1.12 (0.83, 1.52) |
| PTPN22        | rs2476601  | A | 0.11 | 0.08 | 0.096 A | 0.096 | 1.45 (0.93, 2.27) |
| RANTES (CCL5) | rs2107538  | T | 0.20 | 0.16 | 0.057 T | 0.070 | 1.34 (0.98, 1.85) |
|               | rs2280788  | G | 0.03 | 0.02 | 0.27 T  | 0.28  | 1.58 (0.69, 3.61) |
| SLITRK5*      | rs1074044  | C | 0.47 | 0.45 | 0.47 T  | 0.47  | 1.10 (0.86, 1.40) |
| STAT4         | rs8179673  | C | 0.28 | 0.22 | 0.015 D | 0.021 | 1.40 (1.05, 1.85) |
|               | rs3821236  | A | 0.23 | 0.19 | 0.038 D | 0.077 | 1.31 (0.97, 1.78) |
|               | rs7574865  | T | 0.28 | 0.22 | 0.014 D | 0.019 | 1.40 (1.06, 1.86) |
| TNFAIP3       | rs6920220  | A | 0.22 | 0.21 | 0.77 D  | 0.79  | 1.04 (0.77, 1.41) |
|               | rs13207033 | A | 0.27 | 0.28 | 0.36 D  | 0.61  | 0.93 (0.71, 1.23) |
| TRAF1-C5      | rs2900180  | T | 0.38 | 0.32 | 0.071 A | 0.071 | 1.27 (0.98, 1.64) |
|               | rs3761847  | A | 0.44 | 0.38 | 0.045 A | 0.045 | 1.30 (1.01, 1.68) |
| VTCN1         | rs12046117 | T | 0.15 | 0.14 | 0.42 A  | 0.42  | 1.15 (0.81, 1.64) |

\* No gene attribution in original publication, closest gene by UCSC Genome Browser listed

§ Model providing most significant P value: A = allelic, G = genotypic, T = Cochran Armitage Trend Test (additive), D = dominant, R = recessive

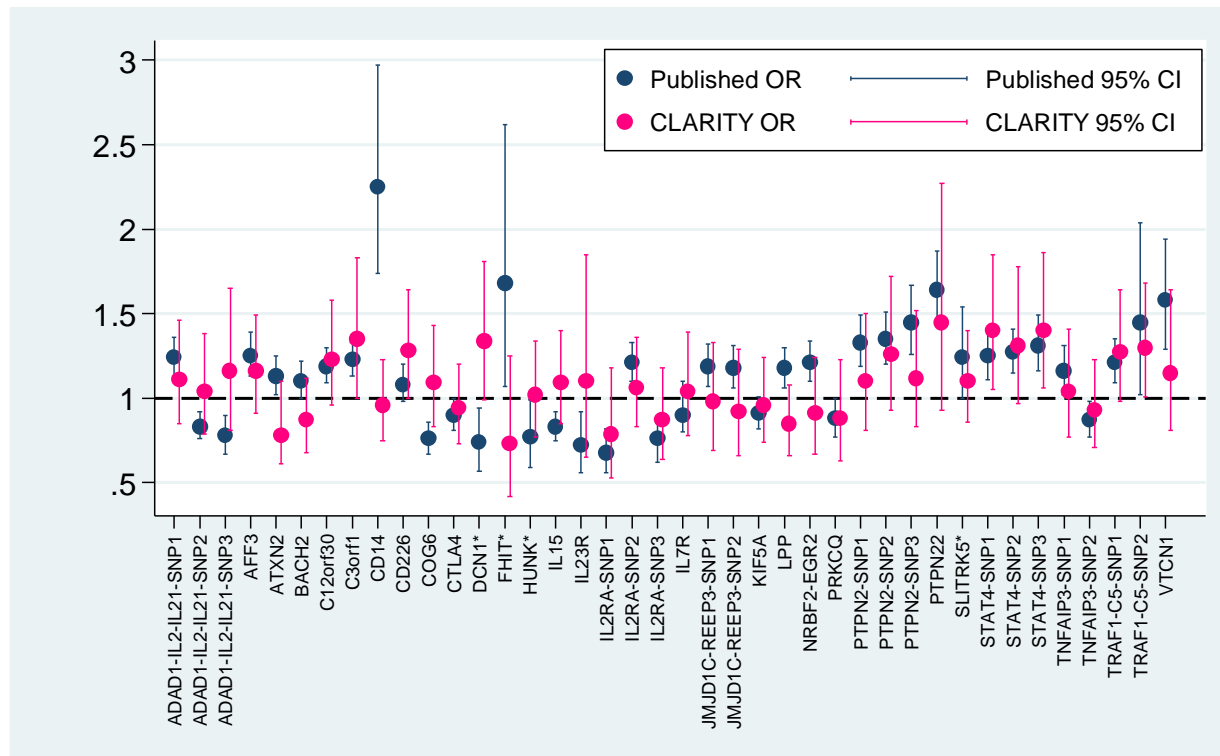

**Supplementary Figure 1. Forest Plot comparing previously published odds ratios (ORs) with CLARITY ORs (European ancestry samples only) for genes examined via nearby SNPs.**

Where more than one previously published OR was identified for a SNP, the OR based on the largest sample size was used. Full data is available in Supplementary Table 1. Some examined genes were excluded from this figure (see text for explanation). For genes with multiple SNPs (eg ADAD1-IL2-IL21) the SNPs are presented in the same order as listed in Supplementary Table 1.

\* No gene attribution in original publication, closest gene by UCSC Genome Browser listed.
